# Supplementary material
Source: Springer Nature journal article supplement (https://www.springermedizin.de/resource/supplementary/13023_2014_719_MOESM6_ESM.docx/9642914)
Supplement: MOESM6 [file 9642914]

Table 3. Key facts and state of play in December 2013: Rare disease patient registration and data collection[[1]](#footnote-1)

| - Around 640 rare disease registries in Europe[[2]](#footnote-2) - Majority of registries are academic - Some RD have more than one registry, many RD have no registry - *EUCERD Core Recommendations on Rare Disease Patient Registration and Data Collection* adopted on 5 June 2013 - Consensus on 6 main areas : international operability, sources of data, collection of data, good practices, use of data for regulatory purposes, and sustainability |
| --- |

1. Data as of December 2013 from [www.orpha.net](http://www.orpha.net) concerning European Member States and surrounding European countries in the Orphanet Consortium. [↑](#footnote-ref-1)
2. [↑](#footnote-ref-2)
